# Supplementary material for: Controversial Aspects of Diagnostics and Therapy of Arthritis of the Temporomandibular Joint in Rheumatoid and Juvenile Idiopathic Arthritis—An Analysis of Evidence- and Consensus-Based Recommendations Based on an Interdisciplinary Guideline Project
Source: MDPI journal article supplement (doi:10.3390/jcm11071761), 2022-03-22
Supplement: s1 [file s1]

Table S1: Members of the working group „oral and maxillofacial surgeons“ (OMFS) of the German Association for Oral and Maxillofacial Surgery (Deutsche Gesellschaft für Mund-, Kiefer- und Gesichtschirurgie - DGMKG)

| Department/Clinic/Medical Practice                                                                                              | Members                                                            |
|---------------------------------------------------------------------------------------------------------------------------------|--------------------------------------------------------------------|
| Klinik und Poliklinik für Mund-, Kiefer- und Gesichtschirurgie, Universitätsklinikum Marburg, Baldingerstraße 35043, Marburg    | Prof. Dr. med. Dr. med. dent. Prof. h.c. (BNMU, Kyiv) Andreas Neff |
| Klinik für Mund-, Kiefer- und Gesichtschirurgie Universitätsklinikum Münster Albert-Schweitzer-Campus 1 48149 Münster           | Prof. Dr. med. Dr. med. dent. Johannes Kleinheinz                  |
| Universitätsklinik für Mund-, Kiefer- und Gesichtschirurgie Universitätskliniken/Tirol Kliniken Anichstraße 35 A-6020 Innsbruck | Prof. Dr. med. Dr. med. dent. Andreas Kolk                         |
| Medizin & Ästhetik, Praxisklinik für Mund-, Kiefer- und Gesichtschirurgie Lenbachplatz 2a Alte Börse 80333 München              | Prof. Dr. med. Dr. med. dent. Christoph Pautke                     |
| MVZ R(h)einZahn Welschnonnenstraße 1-5 53111 Bonn                                                                               | Prof. Dr. med. Dr. med. dent. Rudolf Reich                         |
| Praxis für Gesichtschirurgie und Kiefergelenkchirurgie Brockdorfstr. 90 22149 Hamburg                                           | Dr. med. Dr. med. dent. Marcus Teschke                             |

Table S2: Participating medical Expert Associations and Patient Associations including the elected Representatives

| Association                                                                     | Elected Representative                                             |
|---------------------------------------------------------------------------------|--------------------------------------------------------------------|
| Deutsche Gesellschaft für Mund-, Kiefer-, Gesichtschirurgie (DGMKG)             | Prof. Dr. med. Dr. med. dent. Prof. h.c. (BNMU, Kyiv) Andreas Neff |
| Deutschen Gesellschaft für Neuroradiologie (DGNR)                               | Priv.-Doz. Dr. med. Tim Hilgenfeld                                 |
| Deutsche Gesellschaft für Orthopädie und Orthopädische Chirurgie (DGOOC)        | Dr. med. Martin Arbogast                                           |
| Deutsche Gesellschaft für Zahn-, Mund- und Kieferheilkunde (DGZMK)              |                                                                    |
| - Arbeitsgemeinschaft für Oral- und Kieferchirurgie (AGOKI)                     | Dr. med. Dr. med. dent. Andreas Schön                              |
| - Deutsche Gesellschaft für Funktionsdiagnostik und -therapie (DGFDt)           | Priv.-Doz. Dr. med. dent. Oliver Ahlers                            |
| - Deutsche Gesellschaft für Kieferorthopädie (DGKFO)                            | Prof. Dr. med. dent. Bernd Koos                                    |
| - Deutsche Gesellschaft für Kinderzahnheilkunde (DGKIZ)                         | Prof. Dr. med. dent. Christian Hirsch                              |
| - Deutsche Gesellschaft für Prothetische Zahnmedizin und Biomaterialien (DGPro) | Prof. Dr. med. dent. Peter Ottl                                    |
| Deutsche Röntgengesellschaft (DRG)                                              | Priv.-Doz. Dr. med. Wolfgang Wüst                                  |
| Deutscher Verband für Physiotherapie (ZVK)                                      | Ima Feurer                                                         |
| Gesellschaft für Kinder- und Jugendrheumatologie (GKJR)                         | Dr. med. Boris Hügler                                              |
| Gesellschaft für Pädiatrische Radiologie (GPR)                                  | Priv.-Doz. Dr. med. Thekla von Kalle                               |
| Patientenverband                                                                | Mandatsträger                                                      |
| Deutsche Rheuma-Liga: Bundesverband                                             | Mario Habermann-Krebs                                              |
